# Supplementary material for: Catalytic conversion of biomass pyrolysis vapors into hydrocarbon fuel precursors
Source: Royal Society of Chemistry journal article supplement (doi:10.1039/c4gc02238f), 2015-01-01
Supplement: c4gc02238f1.pdf [file c4gc02238f1.pdf]

### Supplementary Material

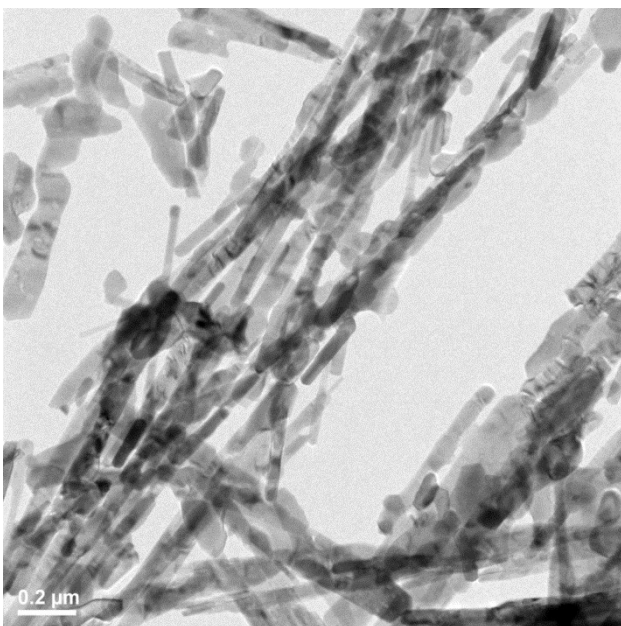

**Figure S1a. TEM image of anatase TiO<sub>2</sub> nanorods**

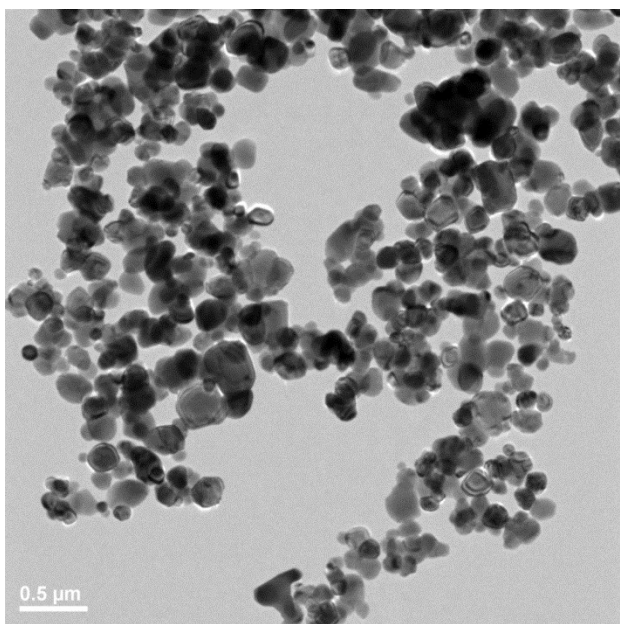

**Figure S1b. TEM image of commercial anatase TiO<sub>2</sub> nanopowder**

**Table S1.** Physicochemical Properties of Sugar Maple

| Physicochemical Properties              | Sugar Maple Feedstock |
|-----------------------------------------|-----------------------|
| Proximate analysis (wt.% dry basis)     |                       |
| Volatile Matter                         | 85.56                 |
| Fixed Carbon                            | 13.63                 |
| Ash                                     | 0.81                  |
| Ultimate analysis (wt.% dry basis)      |                       |
| Carbon                                  | 48.91                 |
| Hydrogen                                | 5.87                  |
| Nitrogen                                | < 0.5                 |
| Sulfur                                  | <0.05                 |
| Chlorine                                | 69ppm                 |
| Oxygen (by difference)                  | 44.39                 |
| Compositional analysis (wt.% dry basis) |                       |
| Glucan                                  | 39.44                 |
| Xylan                                   | 15.91                 |
| Acetyl                                  | 3.76                  |
| Arabinan                                | 0.23                  |
| Mannan                                  | 2.27                  |
| Total Lignin                            | 26.33                 |
| Water Extractable others                | 3.63                  |
| Ethanol Extractives                     | 1.27                  |

**Table S2:** Summary of the carbon yields of the primary monofunctional species obtained after reacting biomass pyrolysis vapors over various TiO<sub>2</sub> nanorods; reaction conditions: temperature (550 °C), and catalyst-to-feed ratio (8 w/w).

| Catalysts                                              | <i>Blank</i> | <i>TiO<sub>2</sub><br/>nanorods</i> | <i>1 wt%<br/>Ni/TiO<sub>2</sub><br/>nanorods</i> | <i>5 wt%<br/>Ni/TiO<sub>2</sub><br/>nanorods</i> | <i>1 wt%<br/>Pt/TiO<sub>2</sub><br/>nanorods</i> | <i>5 wt%<br/>Pt/TiO<sub>2</sub><br/>nanorods</i> |
|--------------------------------------------------------|--------------|-------------------------------------|--------------------------------------------------|--------------------------------------------------|--------------------------------------------------|--------------------------------------------------|
| <b>Monofunctional molecules</b>                        |              |                                     |                                                  |                                                  |                                                  |                                                  |
| <i>Linear ketones</i>                                  |              |                                     |                                                  |                                                  |                                                  |                                                  |
| Acetone                                                | BDL          | 1.82                                | 1.0                                              | 0.67                                             | 1.08                                             | 1.42                                             |
| 2-Butanone                                             | BDL          | 1.37                                | BDL                                              | BDL                                              | 2.38                                             | 2.90                                             |
| 2-Pentanone                                            | BDL          | 0.07                                | BDL                                              | BDL                                              | 0.09                                             | 0.44                                             |
| 3-Pentanone                                            | BDL          | BDL                                 | BDL                                              | BDL                                              | 0.41                                             | BDL                                              |
| 3-Penten-2-one                                         | BDL          | BDL                                 | BDL                                              | BDL                                              | BDL                                              | BDL                                              |
| C6/C7 ketones                                          | BDL          | BDL                                 | BDL                                              | BDL                                              | 0.04                                             | 1.06                                             |
| <i>Cyclic ketones</i>                                  |              |                                     |                                                  |                                                  |                                                  |                                                  |
| 2-Cyclopenten-1-one(s)                                 | BDL          | 3.22                                | 1.21                                             | 3.25                                             | 2.02                                             | 2.63                                             |
| Cyclopentanone                                         | BDL          | 0.60                                | BDL                                              | 0.61                                             | BDL                                              | 0.33                                             |
| <i>Other useful monofunctional species</i>             |              |                                     |                                                  |                                                  |                                                  |                                                  |
| Methanol                                               | BDL          | 0.97                                | 0.94                                             | 0.73                                             | 0.65                                             | 0.62                                             |
| Acetaldehyde                                           | BDL          | 1.53                                | 1.51                                             | 0.99                                             | 0.55                                             | 0.79                                             |
| Furan(s)                                               | BDL          | 0.70                                | 0.51                                             | 0.36                                             | 1.38                                             | 2.11                                             |
| Simple phenols                                         | BDL          | 0.50                                | 0.26                                             | 0.68                                             | 0.42                                             | 0.63                                             |
| <b>Effect on selected primary pyrolysis oxygenates</b> |              |                                     |                                                  |                                                  |                                                  |                                                  |
| Hydroxyacetaldehyde                                    | 9.61         | 0.34                                | 1.36                                             | 1.38                                             | 0.16                                             | 0.29                                             |
| Acetic acid                                            | 4.16         | 4.85                                | 5.02                                             | 5.10                                             | 3.71                                             | 4.41                                             |
| Levoglucosan                                           | 4.04         | 0.64                                | 1.95                                             | 0.55                                             | 0.74                                             | 0.72                                             |
| Hydroxyacetone                                         | 1.22         | 0.75                                | 0.82                                             | 1.30                                             | 0.10                                             | 0.34                                             |
| Methyl pyruvate                                        | 0.70         | 0.01                                | 0.16                                             | 0.30                                             | 0.11                                             | 0.15                                             |
| Furfural                                               | 0.55         | 0.78                                | 0.83                                             | 0.88                                             | 0.16                                             | 0.34                                             |
| 5-Hydroxymethyl furfural                               | 0.42         | 0.02                                | 0.01                                             | 0.22                                             | 0.01                                             | 0.02                                             |
| 2(5H)-Furanone                                         | 0.36         | 0.06                                | 0.06                                             | 0.07                                             | 0.04                                             | 0.06                                             |
| 2-Furanmethanol                                        | 0.06         | 0.06                                | 0.11                                             | 0.16                                             | 0.01                                             | 0.13                                             |
| 2-Furancarboxaldehyde, 5-methyl-                       | 0.02         | 0.03                                | 0.02                                             | 0.01                                             | 0.02                                             | 0.02                                             |

BDL=below detection limit

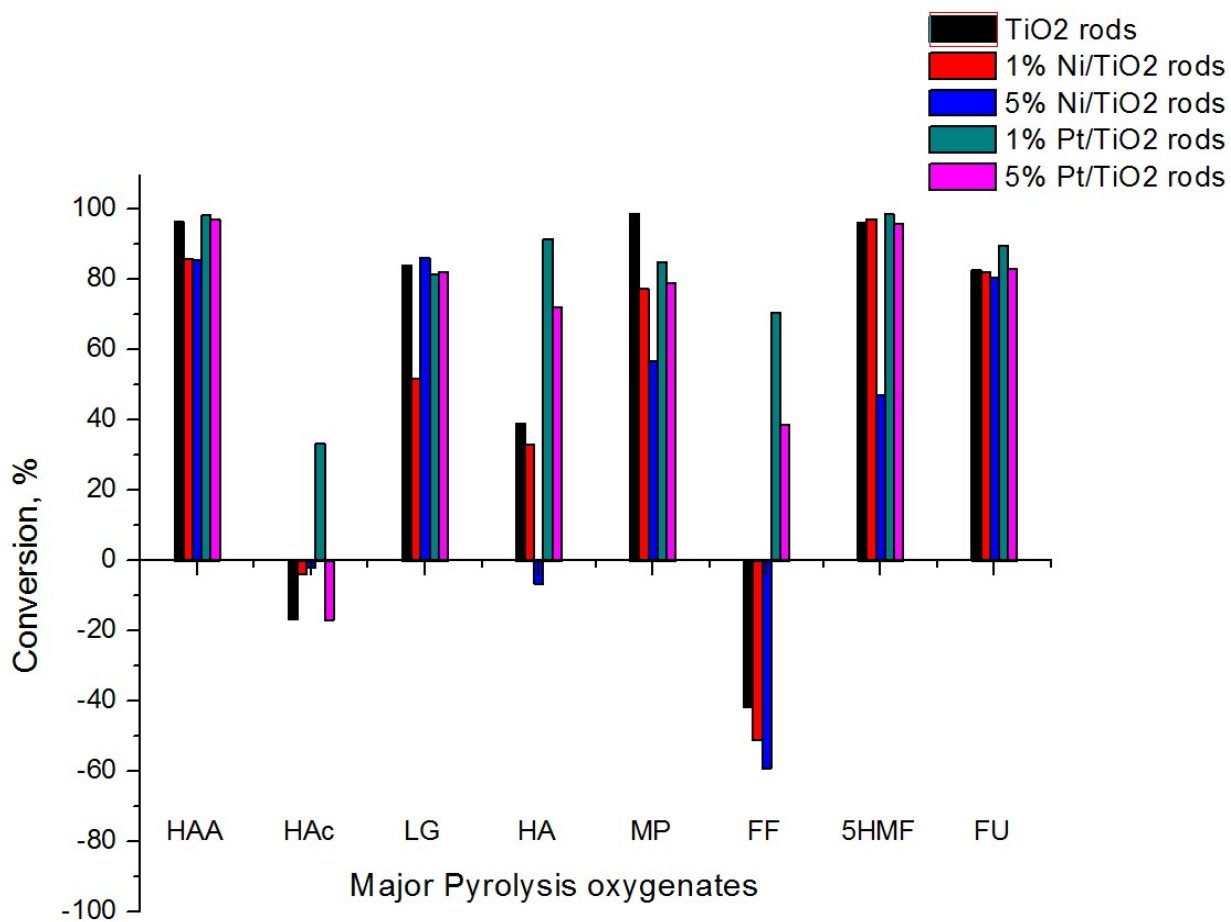

**Figure S2.** Conversion chart of selected pyrolysis oxygenated species over anatase TiO<sub>2</sub> nanorods. The negative conversion values mean the yields of oxygenates increased after the catalytic reaction.

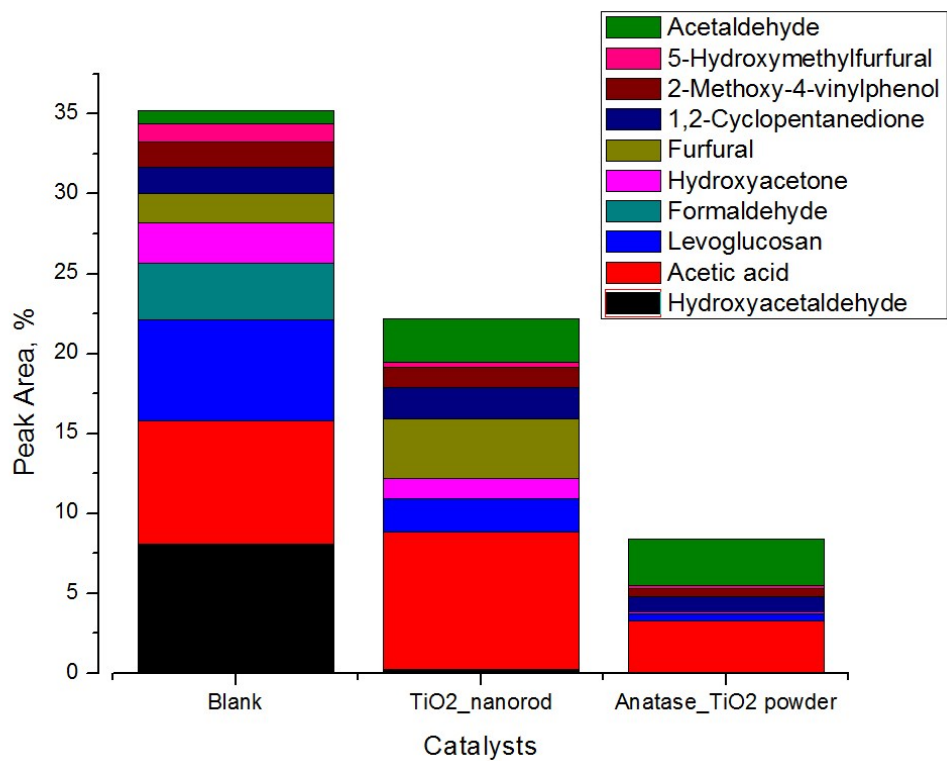

**Figure S2.** Relative intensity of selected pyrolysis oxygenated species after reaction over anatase TiO<sub>2</sub> nanorods and TiO<sub>2</sub> nanopowder.

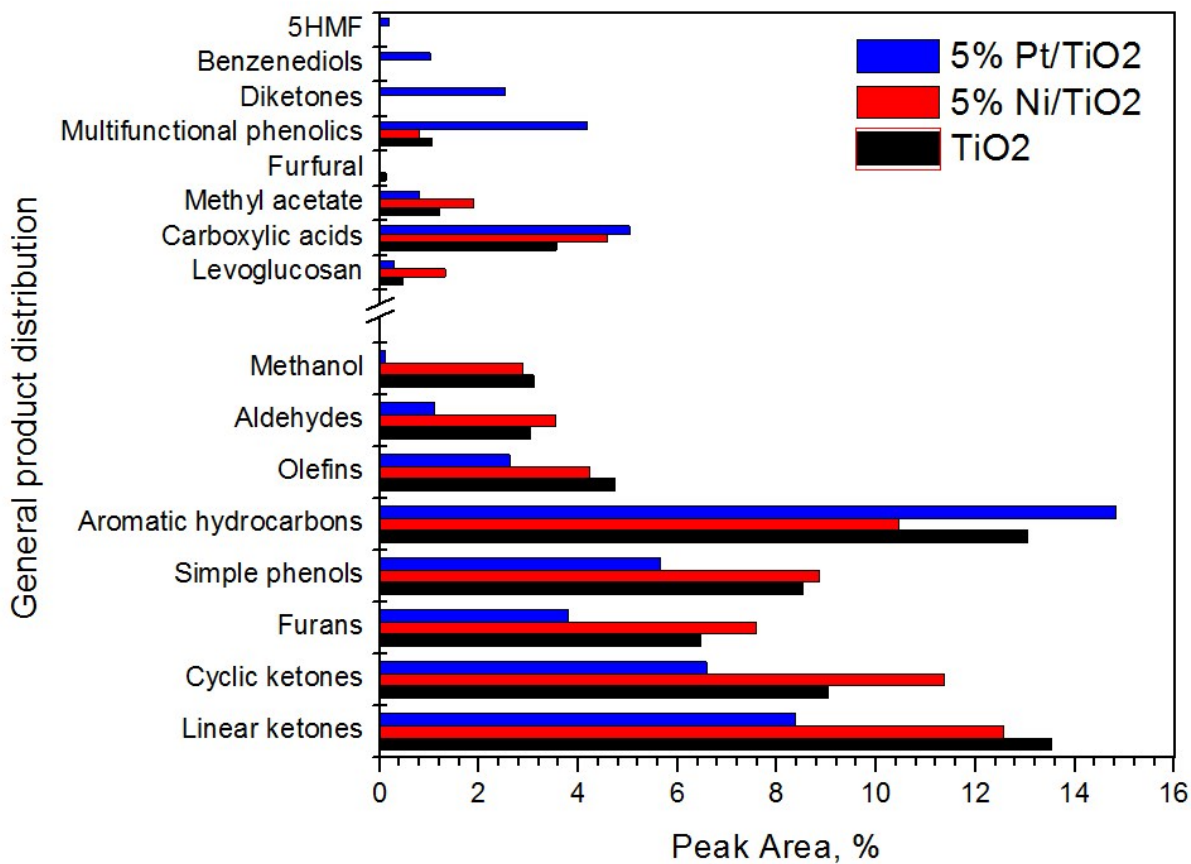

**Figure S4.** Chart showing the effect of impregnating 5wt% of Ni and Pt metals on anatase TiO<sub>2</sub> nanopowder in terms of the conversion of pyrolysis oxygenates and the distribution of key reaction products

**Table S3:** Summary of the carbon yields of the primary monofunctional species obtained after reacting biomass pyrolysis vapors over various TiO<sub>2</sub> nanorods; reaction conditions: temperature (550 °C), and catalyst-to-feed ratio (8 w/w)

| Catalysts                                              | Blank | CaO/CeO <sub>2</sub> | ZrO <sub>2</sub> | MgO  | Rutile TiO <sub>2</sub> |
|--------------------------------------------------------|-------|----------------------|------------------|------|-------------------------|
| <b>Monofunctional molecules</b>                        |       |                      |                  |      |                         |
| <i><b>Linear ketones</b></i>                           |       |                      |                  |      |                         |
| Acetone                                                | BDL   | 4.52                 | 2.27             | 1.03 | 0.68                    |
| 2-Butanone                                             | BDL   | 3.5                  | 0.76             | 2.07 | 1.57                    |
| 2-Pentanone                                            | BDL   | 0.86                 | 0.03             | 0.11 | BDL                     |
| 3-Pentanone                                            | BDL   | 1.67                 | BDL              | BDL  | BDL                     |
| 3-Penten-2-one                                         | BDL   | BDL                  | BDL              | BDL  | BDL                     |
| C6/C7 ketones                                          | BDL   | 1.30                 | BDL              | BDL  | BDL                     |
| <i><b>Cyclic ketones</b></i>                           |       |                      |                  |      |                         |
| 2-Cyclopenten-1-one(s)                                 | BDL   | 3.71                 | 0.28             | 1.04 | 0.80                    |
| Cyclopentanone                                         | BDL   | 0.79                 | 0.03             | 0.37 | 0.09                    |
| <i><b>Other useful monofunctional species</b></i>      |       |                      |                  |      |                         |
| Methanol                                               | BDL   | 0.87                 | BDL              | 0.76 | 0.45                    |
| Acetaldehyde                                           | BDL   | 0.37                 | 0.39             | 1.26 | 1.26                    |
| Furan(s)                                               | BDL   | 0.69                 | 1.11             | 0.69 | 0.72                    |
| Simple phenols                                         | BDL   | 1.31                 | 0.56             | 0.26 | 0.43                    |
| <b>Effect on selected primary pyrolysis oxygenates</b> |       |                      |                  |      |                         |
| Hydroxyacetaldehyde                                    | 9.61  | BDL                  | 3.03             | 0.63 | 1.31                    |
| Acetic acid                                            | 4.16  | BDL                  | 3.33             | 2.96 | 4.33                    |
| Levogluconan                                           | 4.04  | BDL                  | 0.38             | 0.40 | 0.24                    |
| Hydroxyacetone                                         | 1.22  | BDL                  | 1.05             | 1.16 | 0.72                    |
| Methyl pyruvate                                        | 0.70  | BDL                  | 0.68             | 0.06 | 0.60                    |
| Furfural                                               | 0.55  | BDL                  | 0.64             | BDL  | 1.08                    |
| 5-Hydroxymethyl furfural                               | 0.42  | BDL                  | 0.46             | 0.14 | 0.29                    |
| 2(5H)-Furanone                                         | 0.36  | BDL                  | 0.04             | 0.06 | 0.05                    |
| 2-Furanmethanol                                        | 0.06  | BDL                  | 0.09             | 0.01 | 0.15                    |
| 2-Furancarboxaldehyde, 5-methyl-                       | 0.02  | 0.04                 | BDL              | 0.01 | 0.20                    |
